# Supplementary material for: Synthesis, characterization, and functional evaluation of branched dodecyl phenol polyoxyethylene ethers: a novel class of surfactants with excellent wetting properties
Source: Royal Society of Chemistry journal article supplement (doi:10.1039/d1ra06873c), 2021-01-01
Supplement: d1ra06873c1.pdf [file d1ra06873c1.pdf]

*Electronic Supplementary Information for RSC Adv.*

**Synthesis, characterization and evaluation of branched dodecyl phenol polyoxyethylene ethers: a novel class of surfactants with excellent wetting properties**

*Xing Wang,<sup>a</sup> Junfeng Qian,<sup>a,\*</sup> Zhonghua Sun,<sup>a</sup> Zihui Zhang,<sup>a</sup> Mingyang He<sup>a</sup>*

<sup>a</sup>Jiangsu Key Laboratory of Advanced Catalytic Materials and Technology, Advanced Catalysis and Green Manufacturing Collaborative Innovation Center, Changzhou University, Changzhou 213164, China.

E-mail: qianjunfeng@cczu.edu.cn (J.F.Q.)

## 1. General Information

$^1\text{H}$  NMR spectra were taken on 500 MHz instruments and spectral data were reported in ppm relative to tetramethylsilane (TMS) as the internal standard and DMSO- $d_6$  as the solvent. All coupling constants ( $J$ ) are reported in Hz with the following abbreviations: s = singlet, d = doublet, dd = double doublet, ddd = double doublet of doublets, t = triplet, dt = double triplet, q = quartet, m = multiplet, br = broad.

## 2. Characterization Data

b-DPEO<sub>7</sub>:  $^1\text{H}$  NMR (500 MHz, DMSO- $d_6$ )  $\delta$  7.23 - 7.06 (m, 2H), 6.89 - 6.80 (m, 2H), 4.60 - 4.55 (m, 1H), 4.06 - 4.02 (m, 2H), 3.75 - 3.70 (m, 2H), 3.59 - 3.56 (m, 2H), 3.54 - 3.47 (m, 20H), 3.43 - 3.39 (m, 2H), 1.65 - 1.43 (m, 3H), 1.27 - 0.95 (m, 11H), 0.87 - 0.49 (m, 11H).

b-DPEO<sub>10</sub>:  $^1\text{H}$  NMR (500 MHz, DMSO- $d_6$ )  $\delta$  7.24 - 7.07 (m, 2H), 6.89 - 6.79 (m, 2H), 4.60 - 4.56 (m, 1H), 4.07 - 4.01 (m, 2H), 3.75 - 3.71 (m, 2H), 3.60 - 3.57 (m, 2H), 3.55 - 3.46 (m, 32H), 3.43 - 3.40 (m, 2H), 1.65 - 1.44 (m, 3H), 1.26 - 0.96 (m, 11H), 0.86 - 0.48 (m, 11H).

b-DPEO<sub>12</sub>:  $^1\text{H}$  NMR (500 MHz, DMSO- $d_6$ )  $\delta$  7.22 - 7.08 (m, 2H), 6.90 - 6.82 (m, 2H), 4.59 - 4.56 (m, 1H), 4.06 - 4.02 (m, 2H), 3.75 - 3.71 (m, 2H), 3.60 - 3.57 (m, 2H), 3.56 - 3.45 (m, 40H), 3.42 - 3.40 (m, 2H), 1.65 - 1.44 (m, 3H), 1.24 - 0.96 (m, 11H), 0.84 - 0.50 (m, 11H).

c-DPEO<sub>10</sub>:  $^1\text{H}$  NMR (500 MHz, DMSO- $d_6$ )  $\delta$  7.26 (d,  $J$  = 8.8 Hz, 2H), 6.83 (d,  $J$  = 8.6 Hz, 2H), 4.59 (s, 1H), 4.06 - 4.02 (m, 2H), 3.74 - 3.70 (m, 2H), 3.59 - 3.56 (m, 2H), 3.51 (d,  $J$  = 3.4 Hz, 35H), 3.39 (d,  $J$  = 22.3 Hz, 8H), 1.67 (s, 2H), 1.29 (s, 6H), 0.67 (s, 9H).

## 3. Copies of $^1\text{H}$ NMR Spectra

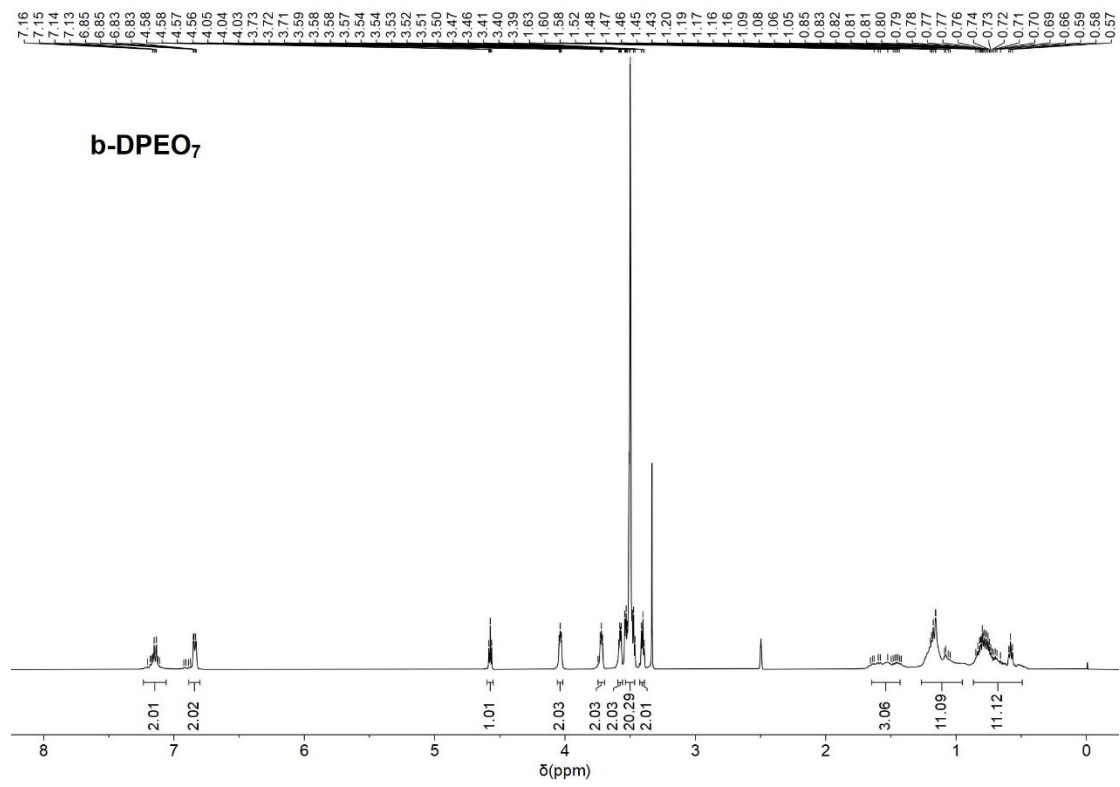

(a)

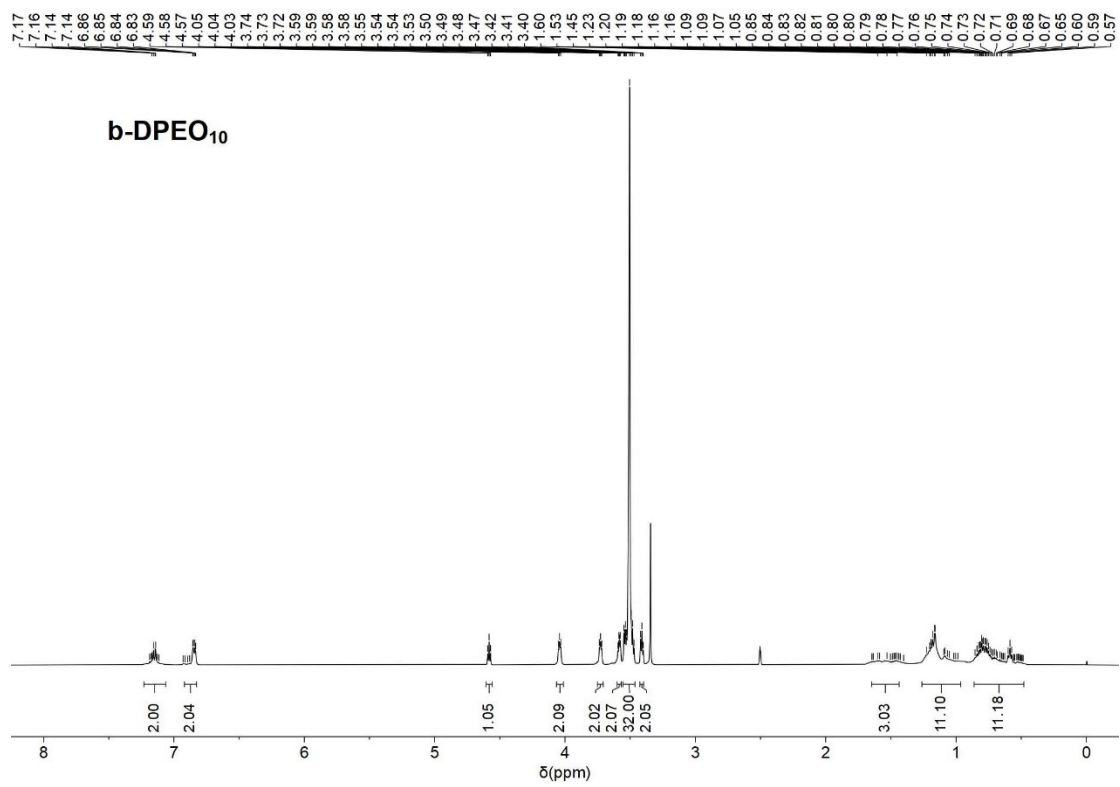

(b)

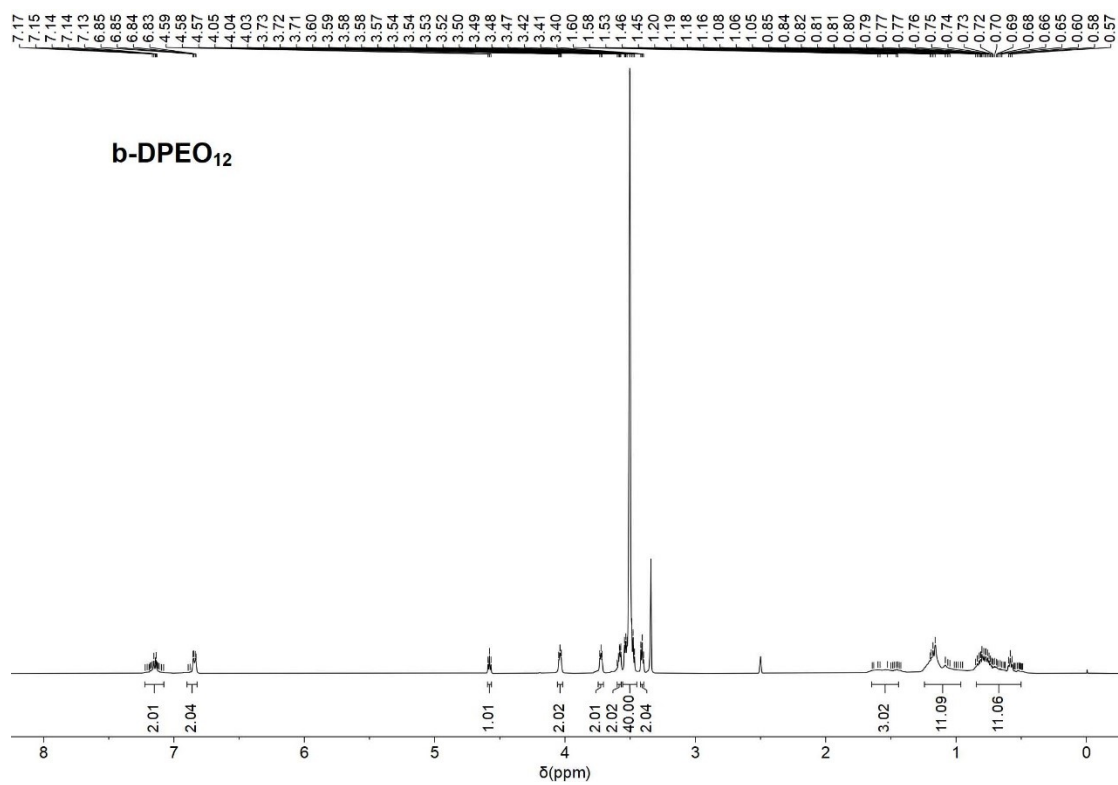

(c)

**c-DPEO<sub>10</sub>**

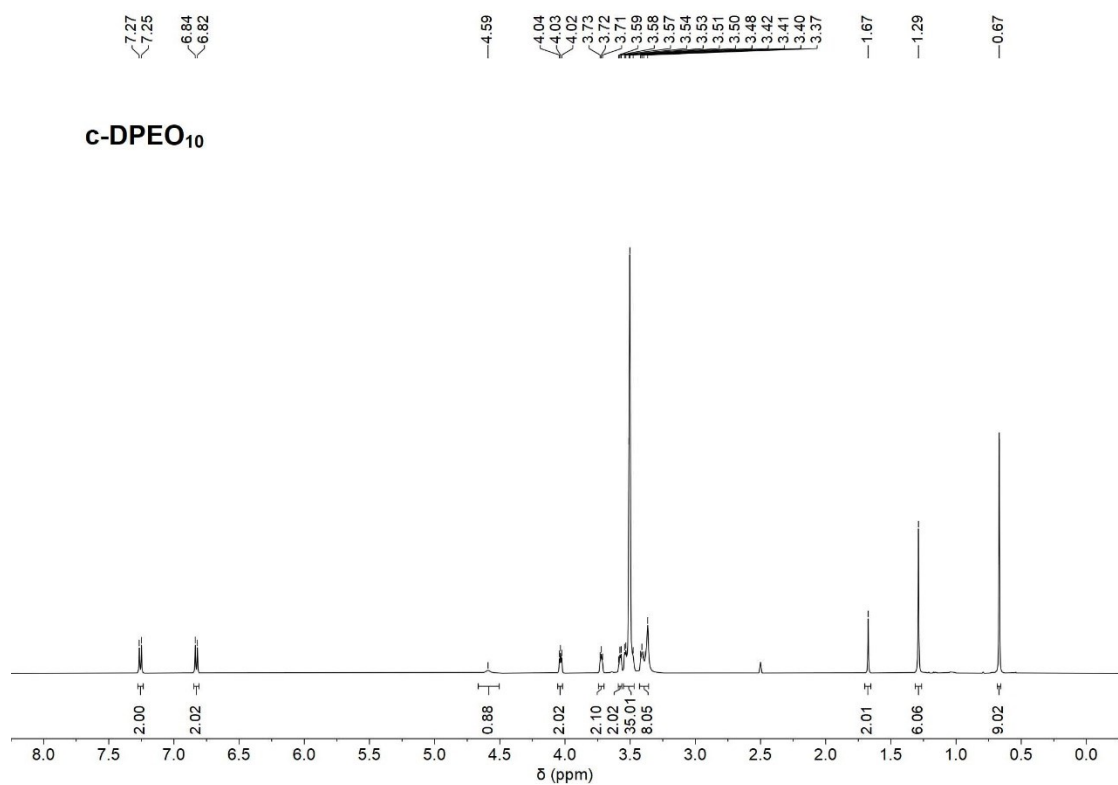

(d)

Fig. S1. <sup>1</sup>H NMR spectra of b-DPEO<sub>7</sub> (a), b-DPEO<sub>10</sub> (b), b-DPEO<sub>12</sub> (c), c-DPEO<sub>10</sub> (d) in DMSO-d<sub>6</sub>.
